# Supplementary material for: Dual function of UPF3B in early and late translation termination
Source: PubMed Central journal article supplement — EMBO J. 2017 Sep 12;36(20):2968–86. doi: 10.15252/embj.201797079 (PMC5641913; doi:10.15252/embj.201797079), 2017-09-12
Supplement: EMBJ-36-2968-s002.pdf [file EMBJ-36-2968-s002.pdf]

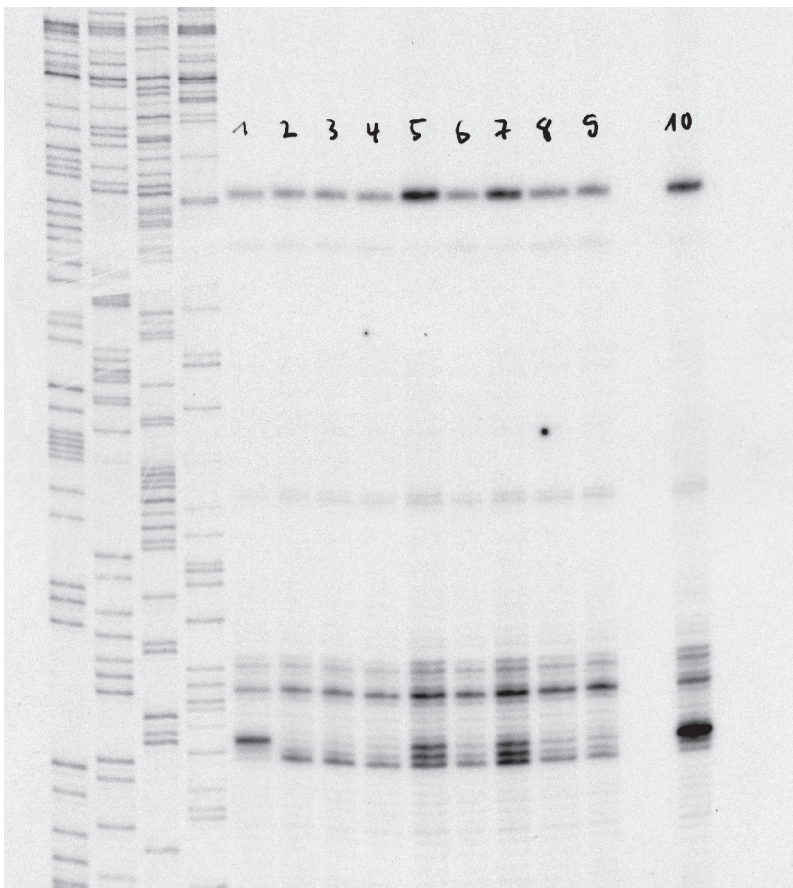

Figure 1B

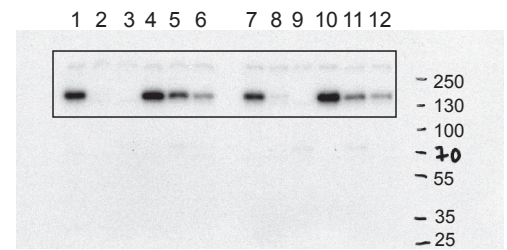

Figure 1D\_upper panel left

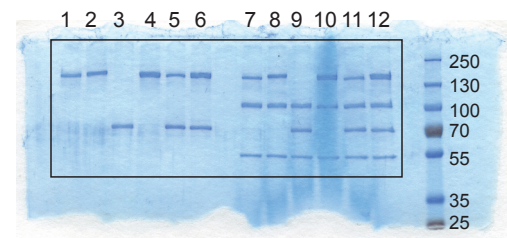

Figure 1D\_lower panel left

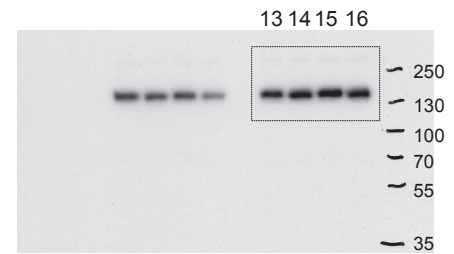

Figure 1D\_upper panel right

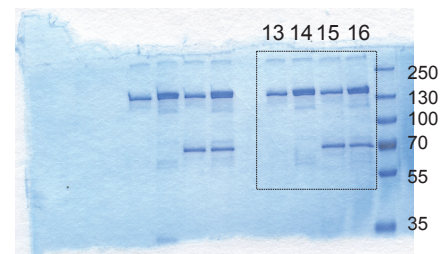

Figure 1D\_lower panel right

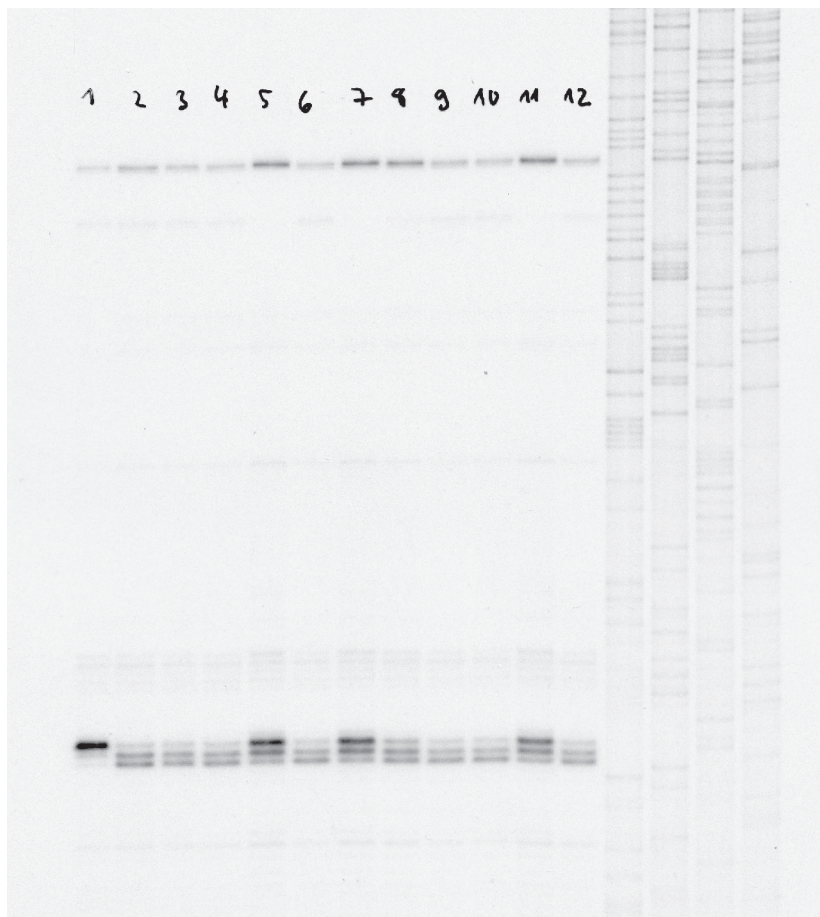

Figure 1E
