# Supplementary material for: Dual function of UPF3B in early and late translation termination
Source: PubMed Central journal article supplement — EMBO J. 2017 Sep 12;36(20):2968–86. doi: 10.15252/embj.201797079 (PMC5641913; doi:10.15252/embj.201797079), 2017-09-12
Supplement: EMBJ-36-2968-s004.pdf [file EMBJ-36-2968-s004.pdf]

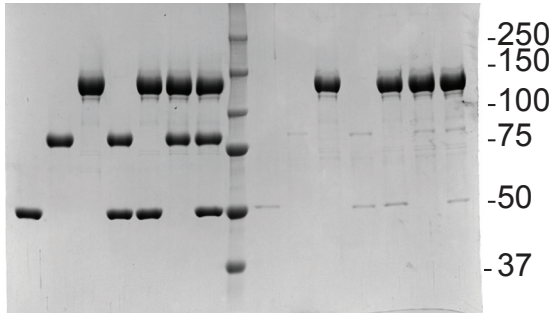

Figure 3B\_input / His-Pulldown

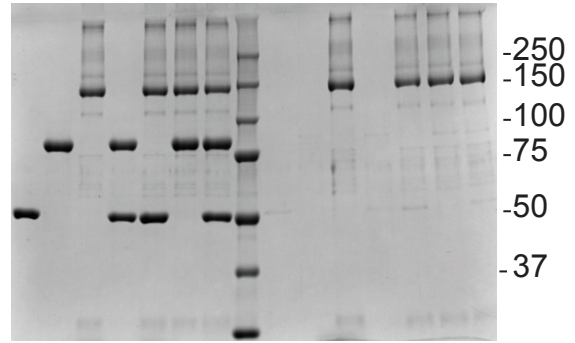

Figure 3C\_input / His-Pulldown

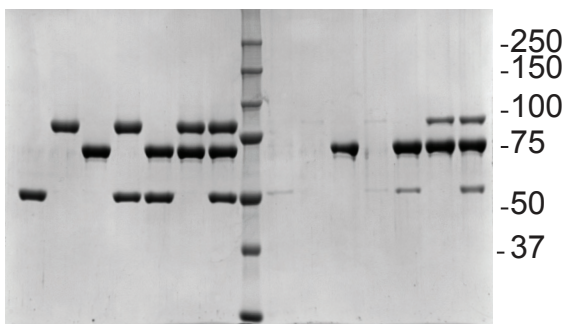

Figure 3D\_Input / His-Pulldown

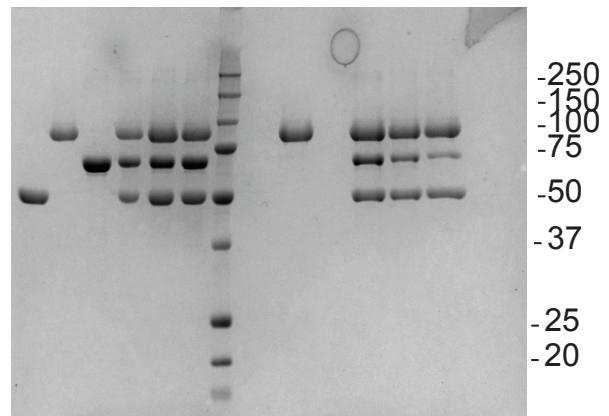

Figure 3E\_Input / His-Pulldown

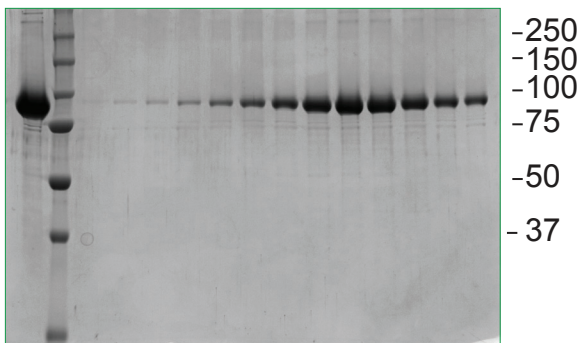

Figure 3F\_eRF3a

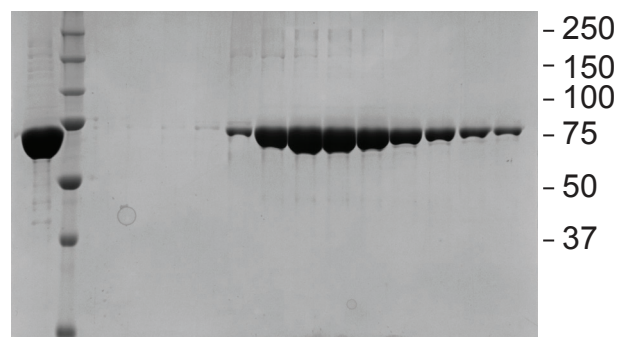

Figure 3F\_UPF3B

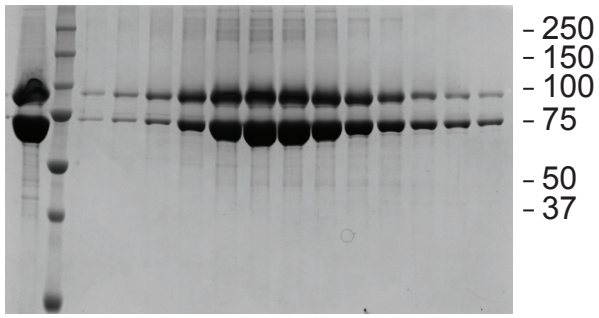

Figure 3F\_eRF3a-UPF3B

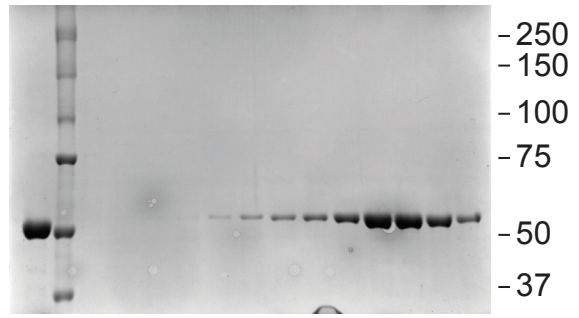

Figure 3G\_eRF1

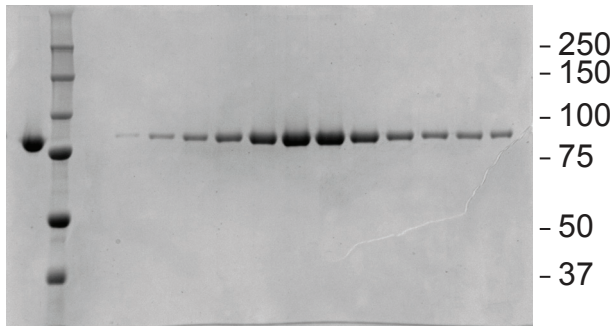

Figure 3G\_eRF3a

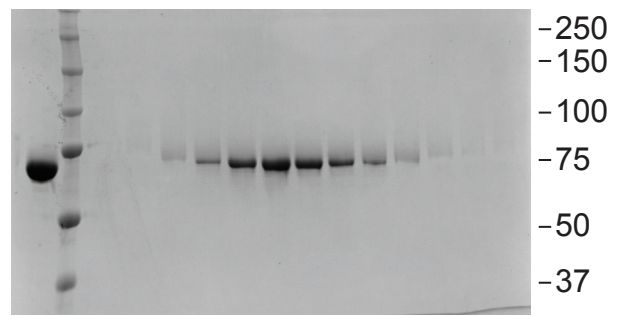

Figure 3G\_UPF3B

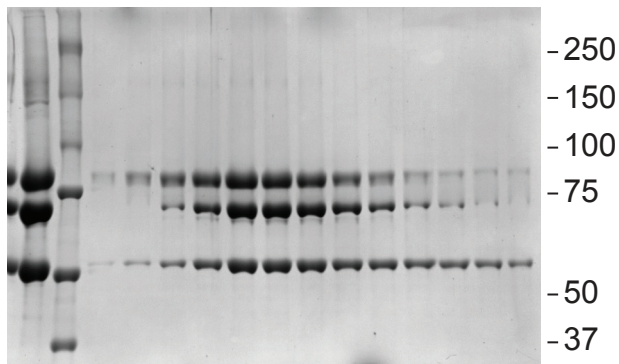

Figure 3G\_eRF1-eRF3a-UPF3B
