# Supplementary material for: Dual function of UPF3B in early and late translation termination
Source: PubMed Central journal article supplement — EMBO J. 2017 Sep 12;36(20):2968–86. doi: 10.15252/embj.201797079 (PMC5641913; doi:10.15252/embj.201797079), 2017-09-12
Supplement: EMBJ-36-2968-s006.pdf [file EMBJ-36-2968-s006.pdf]

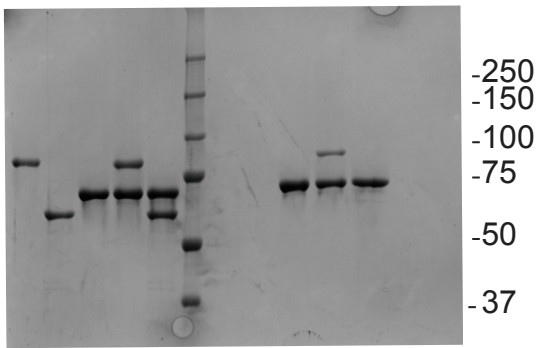

Figure 5B\_Input / His-Pulldown

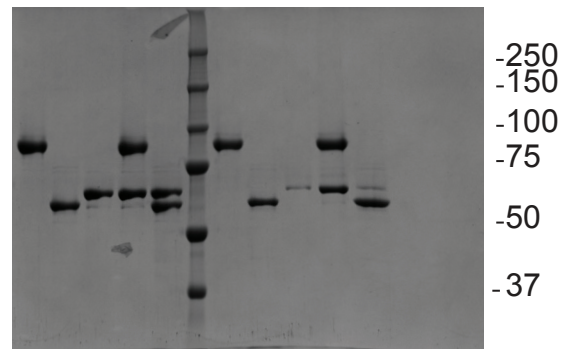

Figure 5C\_Input / His-Pulldown

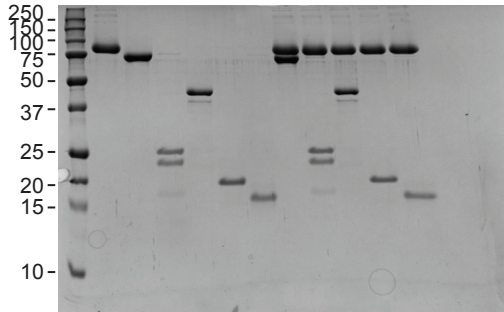

Figure 5E\_Input

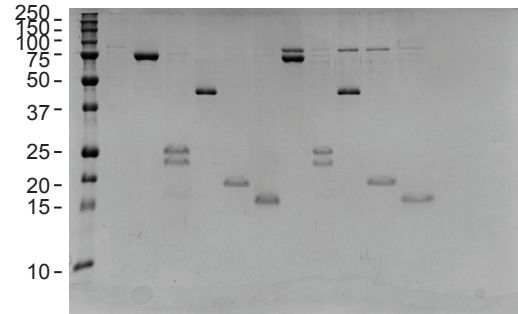

Figure 5E\_His-Pulldown

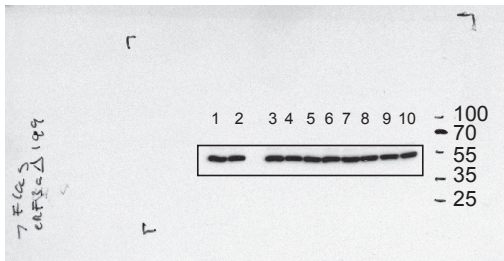

Figure 5F\_input >FLAG

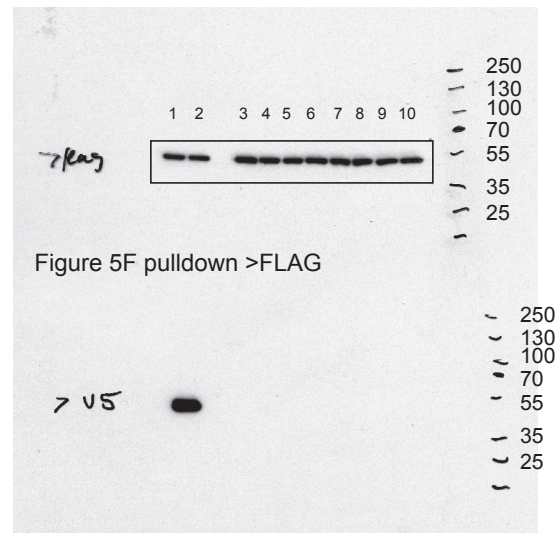

Figure 5F\_pulldown >FLAG

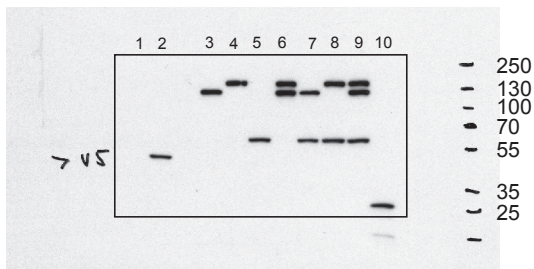

Figure 5F\_input >V5

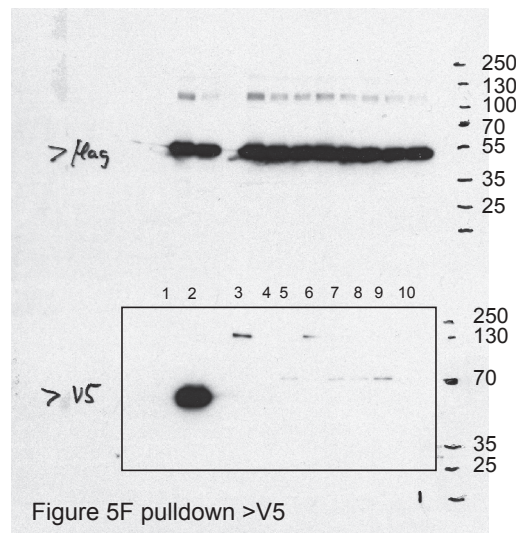

Figure 5F\_pulldown >V5

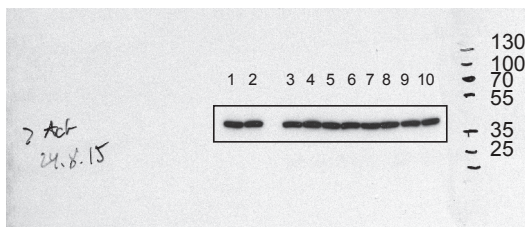

Figure 5F\_input >ACTB

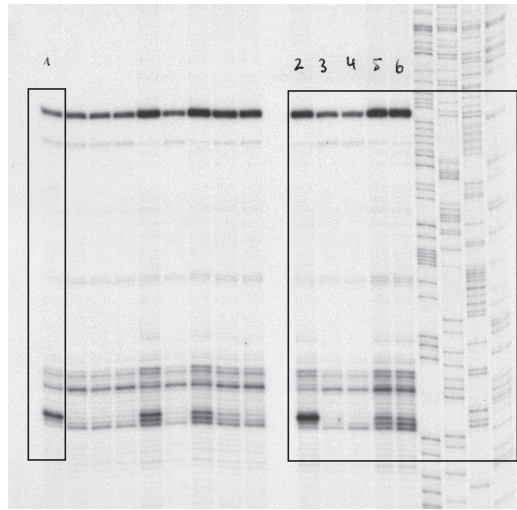

Figure 5G
