# Supplementary material for: Dual function of UPF3B in early and late translation termination
Source: PubMed Central journal article supplement — EMBO J. 2017 Sep 12;36(20):2968–86. doi: 10.15252/embj.201797079 (PMC5641913; doi:10.15252/embj.201797079), 2017-09-12
Supplement: EMBJ-36-2968-s008.pdf [file EMBJ-36-2968-s008.pdf]

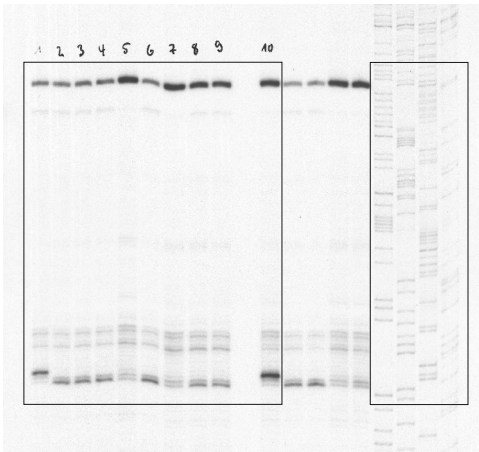

Figure 7A

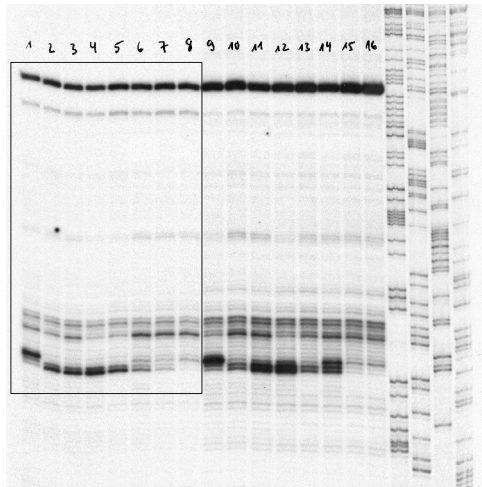

Figure 7B long exposure

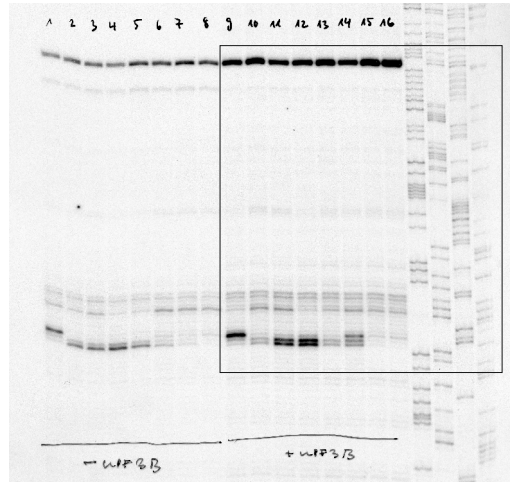

Figure 7B short exposure

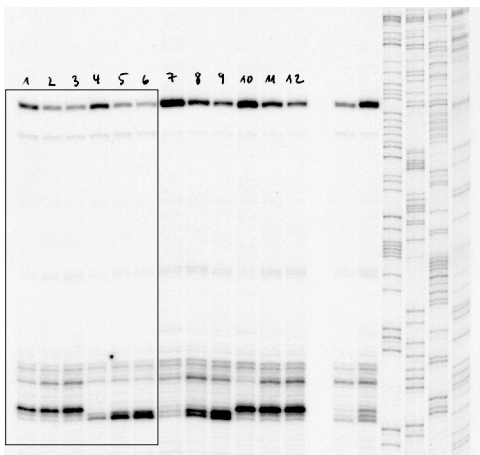

Figure 7C long exposure

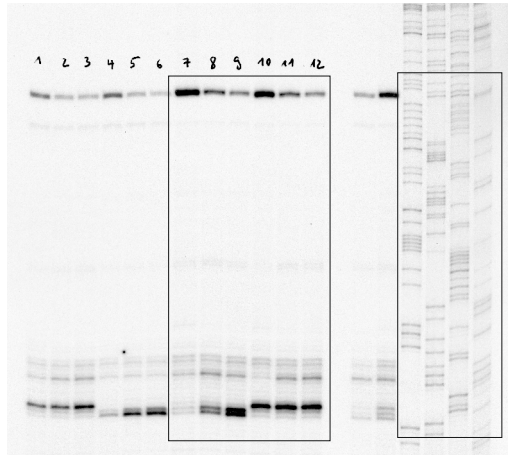

Figure 7C short exposure
