# Supplementary figures and images for: Dual function of UPF3B in early and late translation termination
Source: PubMed Central journal article supplement — EMBO J. 2017 Sep 12;36(20):2968–86. doi: 10.15252/embj.201797079 (PMC5641913; doi:10.15252/embj.201797079), 2017-09-12

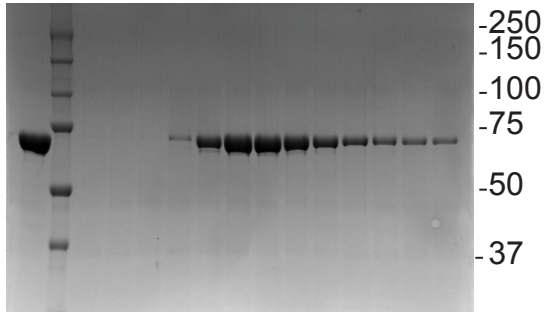

Figure 6A\_UPF3B

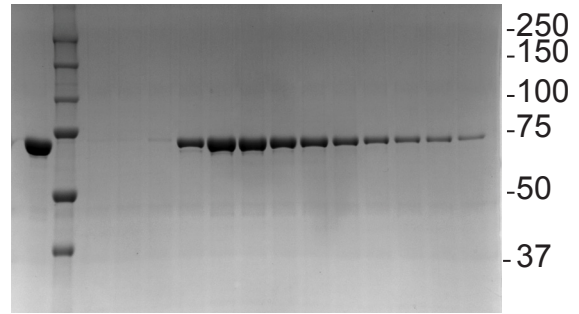

Figure 6A\_UPF3B with RNA

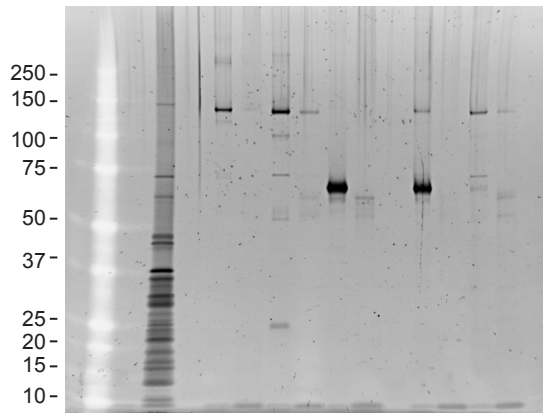

Figure 6B

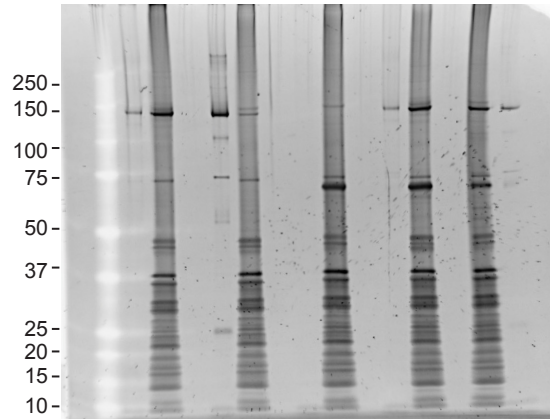

Figure 6C

Supplement: EMBJ-36-2968-s007.pdf [file EMBJ-36-2968-s007.pdf]
